# Supplementary material for: Comparison of two methods to estimate adverse events in the IBEAS Study (Ibero-American study of adverse events): cross-sectional versus retrospective cohort design
Source: PubMed Central journal article supplement — BMJ Open. 2017 Oct 8;7(10):e016546. doi: 10.1136/bmjopen-2017-016546 (PMC5640028; doi:10.1136/bmjopen-2017-016546), 2017-10-08
Supplement: bmjopen-2017-016546supp001.pdf [file bmjopen-2017-016546supp001.pdf]

## **APPENDIX 2: Preventability of Adverse Events**

The Conceptual Framework for the International Classification for Patient Safety defines:

Preventable: is being accepted by the community as avoidable in the particular set of circumstances.

Preventability: To mine the preventability of the AE's, the possibility of their being prevented was scored on a 1-6 scale (1 = no evidence of preventability; 6= total evidence).

Those AE's score within the 1-3 range were considered unpreventable or hardly preventable, those scoring higher than 3 on this scale being considered preventable.

1. No evidence of preventable AE
2. Minimal probability of preventable AE
3. Slight probability of preventable AE
4. Moderate probability of preventable AE
5. Highly probable of preventable AE
6. Total evidence of preventable AE

This definition is proposed in Modular Questionnaire MRF2, in:

T.A. Brennan,L.L. Leape,N.M. Laird,L. Hebert,A.R. Localio,A.G. Lawthers. Incidence of adverse events and negligence in hospitalized patients. Results of the Harvard Medical Practice Study I. N Engl J Med, 324 (1991), pp. 370-376
